# Supplementary material for: OSCAR (Osteopathic Single CAse Research): A Single Case Experimental Design study evaluating osteopathic management for non-specific low back pain
Source: Research Square preprint supplement (doi:10.21203/rs.3.rs-6147823/v1), 2025-05-15
Supplement: Supplementary file 1 [file 43c18ed1323f28814177c9f4.pdf]

The Single-Case Reporting Guideline In BEhavioural Interventions (SCRIBE) 2016 Checklist

| Item num                       | Topic      | Item description                                                                                                                                                                                                                                                                                   | Page |
|--------------------------------|------------|----------------------------------------------------------------------------------------------------------------------------------------------------------------------------------------------------------------------------------------------------------------------------------------------------|------|
| <b>TITLE and ABSTRACT</b>      |            |                                                                                                                                                                                                                                                                                                    |      |
| 1                              | Title      | Identify the research as a single-case experimental design in the title                                                                                                                                                                                                                            | 1    |
| 2                              | Abstract   | Summarize the research question, population, design, methods including interventions (independent variable/s) and target behavior/s and any other outcome/s (dependent variable/s), results, and conclusions                                                                                       | 1    |
| <b>INTRODUCTION</b>            |            |                                                                                                                                                                                                                                                                                                    |      |
| 3                              | Scientific | Describe the scientific background to identify issues under analysis, current scientific knowledge, and gaps in that knowledge base                                                                                                                                                                | 2-3  |
| 4                              | Aims       | State the purpose/aims of the study, research question/s, and, if applicable, hypotheses                                                                                                                                                                                                           | 3    |
| <b>METHOD</b>                  |            |                                                                                                                                                                                                                                                                                                    |      |
| <b>DESIGN</b>                  |            |                                                                                                                                                                                                                                                                                                    |      |
| 5                              | Design     | Identify the design (e.g., withdrawal/reversal, multiple-baseline, alternating-treatments, changing-criterion, some combination thereof, or adaptive design) and describe the phases and phase sequence (whether determined a priori or data-driven) and, if applicable, criteria for phase change | 4    |
| 6                              | Procedur   | Describe any procedural changes that occurred during the course of the investigation after the start of the study                                                                                                                                                                                  | 10   |
| 7                              | Replicatio | Describe any planned replication                                                                                                                                                                                                                                                                   | 4    |
| 8                              | Randomiz   | State whether randomization was used, and if so, describe the randomization method and the elements of the study that were randomized                                                                                                                                                              | 5    |
| 9                              | Blinding   | State whether blinding/masking was used, and if so, describe who was blinded/masked                                                                                                                                                                                                                | 8    |
| <b>PARTICIPANT/S or UNIT/S</b> |            |                                                                                                                                                                                                                                                                                                    |      |
| 10                             | Selection  | State the inclusion and exclusion criteria, if applicable, and the method of recruitment                                                                                                                                                                                                           | 4-5  |
| 11                             | Participan | For each participant, describe the demographic characteristics and clinical (or other) features relevant to the research question, such that anonymity is ensured                                                                                                                                  | 6    |
| <b>CONTEXT</b>                 |            |                                                                                                                                                                                                                                                                                                    |      |
| 12                             | Setting    | Describe characteristics of the setting and location where the study was conducted                                                                                                                                                                                                                 | 4    |
| <b>APPROVALS</b>               |            |                                                                                                                                                                                                                                                                                                    |      |
| 13                             | Ethics     | State whether ethics approval was obtained and indicate if and how informed consent and/or assent were obtained                                                                                                                                                                                    | 4    |
| <b>MEASURES and MATERIALS</b>  |            |                                                                                                                                                                                                                                                                                                    |      |

|                      |                |                                                                                                                                                                                                                                                 |       |
|----------------------|----------------|-------------------------------------------------------------------------------------------------------------------------------------------------------------------------------------------------------------------------------------------------|-------|
| 14                   | Measures       | Operationally define all target behaviors and outcome measures, describe reliability and validity, state how they were selected, and how and when they were measured                                                                            | 6     |
| 15                   | Equipment      | Clearly describe any equipment and/or materials (e.g., technological aids, biofeedback, computer programs, intervention manuals or other material resources) used to measure target behavior/s and other outcome/s or deliver the interventions | 6     |
| <b>INTERVENTIONS</b> |                |                                                                                                                                                                                                                                                 |       |
| 16                   | Intervention   | Describe the intervention and control condition in each phase, including how and when they were actually administered, with as much detail as possible to facilitate attempts at replication                                                    | 7     |
| 17                   | Procedures     | Describe how procedural fidelity was evaluated in each phase                                                                                                                                                                                    | 6     |
| <b>ANALYSIS</b>      |                |                                                                                                                                                                                                                                                 |       |
| 18                   | Analyses       | Describe and justify all methods used to analyze data                                                                                                                                                                                           | 7-8   |
| <b>RESULTS</b>       |                |                                                                                                                                                                                                                                                 |       |
| 19                   | Sequence       | For each participant, report the sequence actually completed, including the number of trials for each session for each case. For participant/s who did not complete, state when they stopped and the reasons                                    | 5&9   |
| 20                   | Outcomes       | For each participant, report results, including raw data, for each target behavior and other outcome/s                                                                                                                                          | 9     |
| 21                   | Adverse events | State whether or not any adverse events occurred for any participant and the phase in which they occurred                                                                                                                                       | 10    |
| <b>DISCUSSION</b>    |                |                                                                                                                                                                                                                                                 |       |
| 22                   | Interpretation | Summarize findings and interpret the results in the context of current evidence                                                                                                                                                                 | 11-13 |
| 23                   | Limitations    | Discuss limitations, addressing sources of potential bias and imprecision                                                                                                                                                                       | 13-14 |
| 24                   | Applicability  | Discuss applicability and implications of the study findings                                                                                                                                                                                    | 11-13 |
| <b>DOCUMENTATION</b> |                |                                                                                                                                                                                                                                                 |       |
| 25                   | Protocol       | If available, state where a study protocol can be accessed                                                                                                                                                                                      | 4     |
| 26                   | Funding        | Identify source/s of funding and other support; describe the role of funders                                                                                                                                                                    | 17    |
